# Supplementary material for: Impact of birth weight on adult-onset diabetes mellitus in relation to current body mass index: The Japan Nurses' Health Study
Source: PubMed Central journal article supplement (PMC5565756; doi:10.1016/j.je.2016.08.016), 2017-06-20
Supplement: mmc1.pdf [file mmc1.pdf]

**eTable 1.** Odds ratio for developing adult-onset DM per 100 g increase in birth weight by birth weight percentile category and parental DM history<sup>a, b</sup>

| (Number of participants; %) | Birth weight percentile category                  |        |      |                                   |        |      |                                                      |        |      |  |
|-----------------------------|---------------------------------------------------|--------|------|-----------------------------------|--------|------|------------------------------------------------------|--------|------|--|
|                             | Small for gestational age<br>( $< 10$ percentile) |        |      | Appropriate<br>(10–89 percentile) |        |      | Large for gestational age<br>(90 percentile $\leq$ ) |        |      |  |
|                             | 1454 8.2%)                                        |        |      | 13,071 74.0%)                     |        |      | 3144 17.8%)                                          |        |      |  |
|                             | OR                                                | 95% CI |      | OR                                | 95% CI |      | OR                                                   | 95% CI |      |  |
| Overall                     | 0.90                                              | 0.79   | 1.04 | 0.96                              | 0.90   | 1.03 | <b>0.91</b>                                          | 0.84   | 0.99 |  |
| By history of paternal DM   |                                                   |        |      |                                   |        |      |                                                      |        |      |  |
| Yes                         | 0.88                                              | 0.67   | 1.16 | 0.97                              | 0.86   | 1.11 | 0.85                                                 | 0.68   | 1.05 |  |
| No                          | 0.90                                              | 0.76   | 1.05 | 0.96                              | 0.88   | 1.04 | 0.92                                                 | 0.84   | 1.02 |  |
| By history of maternal DM   |                                                   |        |      |                                   |        |      |                                                      |        |      |  |
| Yes                         | 0.78                                              | 0.50   | 1.21 | 1.10                              | 0.95   | 1.27 | 1.04                                                 | 0.81   | 1.35 |  |
| No                          | 0.91                                              | 0.78   | 1.06 | <b>0.92</b>                       | 0.86   | 0.99 | <b>0.88</b>                                          | 0.80   | 0.97 |  |

CI, confidence interval; DM, diabetes mellitus; OR, odds ratio.

<sup>a</sup> Birth weight percentile was calculated using the population average and standard deviation of birth weight according to gestational period. Participants with unknown gestational age (8701 women) or extreme birth weight percentile (703 women) were excluded.

<sup>b</sup> Adjusted for age (continuous)
